# Supplementary material
Source: publisher site journal article supplement (https://www.dovepress.com/get_supplementary_file.php?f=486663.docx)
Supplement: Supplementary file 1 [file get_supplementary_file.php]

**Table S1** Characteristics of all participants in the study

| **Characteristic** | **Total (N = 475)** |
| --- | --- |
| **A**g**e**, M (IQR), years | 87 (84, 90) |
| **Age group** |  |
| 80–84 | 126 (26.5%) |
| 85–89 | 213 (44.8%) |
| ≥ 90 | 136 (28.6%) |
| **Gender** |  |
| Male | 187 (39.4%) |
| Female | 288 (60.6%) |
| **Location** |  |
| Urban | 288 (60.6%) |
| Rural | 187 (39.4%) |
| **Marital status** |  |
| Married | 150 (31.6%) |
| Unmarried | 325 (68.4%) |
| **Education** |  |
| Below primary | 174 (36.6%) |
| Primary | 137 (28.8%) |
| Junior high school | 104 (21.9%) |
| High school and above | 60 (12.6%) |
| **Economic status** |  |
| Enough | 233 (49.1%) |
| Basically enough | 117 (24.6%) |
| Barely enough | 84 (17.7%) |
| Not enough | 41 (8.6%) |
| **Duration of residence** |  |
| < 1 year | 58 (12.2%) |
| 1–2 years | 79 (16.6%) |
| 3–5 years | 168 (35.4%) |
| 6–10 years | 101 (21.3%) |
| > 10 years | 69 (14.5%) |
| **BADL, M (IQR)** | 80.0 (60.0, 95.0) |
| No disability (100 points) | 89 (18.7%) |
| Mild disability (61–99 points) | 254 (53.5%) |
| Moderate disability (41–60 points) | 44 (9.3%) |
| Severe disability (<40 points) | 88 (18.5%) |
| **IADL, M (IQR)** | 3.0 (8.0, 15.0) |
| Independent (< 5 points) | 327 (68.8%) |
| Dependent (≥ 5 points) | 148 (31.2%) |

**Abbreviations:** BADL, basic activities of daily living; IADL, instrumental activities of daily living; M (IQR), median (interquartile range).

**Table S2** Results of evaluating participants' IC using ICOPE steps 1 and 2, respectively

| **Items** | **Evaluation results** |
| --- | --- |
| **Psychological domain** |  |
| **A. ICOPE Step1: screening** |  |
| Q1: feeling down, depressed, or hopeless in the past 2 weeks | 202 (42.5%) |
| Q2: had little interest or pleasure in doing things in the past 2 weeks | 203 (42.7%) |
| **B. ICOPE Step2: PHQ–9** |  |
| PHQ–9 score, M (IQR) | 2.0 (0.0, 10.0) |
| No depression (0–2) | 264 (55.6%) |
| Depression (≥ 3) | 211 (44.4%) |
| **Locomotor domain** |  |
| **A. ICOPE Step1: screening** |  |
| T1: Unable to complete 5 chair rises in 14s | 393 (82.7%) |
| **B. ICOPE Step2: SPPB** |  |
| SPPB score, M (IQR) | 5.0 (2.0, 8.0) |
| Normal mobility (10–12 points) | 77 (16.2%) |
| Limited mobility (0–9 points) | 398 (83.8%) |
| **Cognitive domain** |  |
| **A. ICOPE Step1: screening** |  |
| Q3: cannot answer correctly on time or place | 133 (28.0%) |
| T2: cannot repeat 3 words correctly | 190 (40.0%) |
| **B. ICOPE Step2: MMSE** |  |
| MMSE score, M (IQR) | 27.0 (22.0, 30.0) |
| Cognitive normal (27–30 points) | 268 (56.4%) |
| Cognitive decline (0–26 points) | 207 (43.6%) |
| **Vitality domain** |  |
| **A. ICOPE Step1: screening** |  |
| Q4: have unintentionally lost > 3 kg over the last three months | 93 (19.6%) |
| Q5: have experienced loss of appetite | 194 (40.8%) |
| **B. ICOPE Step2: MNA** |  |
| MNA score, M (IQR) | 24.0 (17.5, 28.0) |
| Normal nutritional status (24–30 points) | 242 (50.9%) |
| (Possible) malnourished (< 23.5 points) | 233 (49.1%) |
| **Sensory domain** **(Visual)** |  |
| **A. ICOPE Step1: screening** |  |
| Q6: reported any vision-related problems | 253 (53.3%) |
| **B. ICOPE Step2: WHO simple eye chart** |  |
| Distance vision |  |
| Better (> 6/18) | 61 (12.8%) |
| Normal (6/18) | 96 (20.2%) |
| Mild impaired (6/60) | 121 (25.5%) |
| Moderate impaired (3/60) | 125 (26.3%) |
| Severe impaired (< 3/60) | 72 (15.2%) |
| Near vision |  |
| Normal (direct vision) | 148 (31.2%) |
| Needs assistance (can see with glasses) | 212 (44.6%) |
| Impaired (cannot see with glasses) | 115 (24.2%) |
| **Sensory domain (Hearing)** |  |
| **A. ICOPE Step 1: screening** |  |
| Q7: reported hearing-related problems | 226 (47.6%) |
| **B. ICOPE Step 2: digits-in-noise test-based hearWHO app** |  |
| Good hearing (> 75 points) | 18 (3.8%) |
| Need regular checkups (50–75 points) | 89 (18.7%) |
| Some degree of hearing loss (< 50 points) | 368 (77.5%) |

**Abbreviations:** ICOPE, integrated care for older people; PHQ–9, Patient Health Questionnaire**–**9 items; SPPB, Short Physical Performance Battery; MMSE, Mini**–**Mental State Examination; MNA, Mini**–**Nutritional Assessment; WHO, World Health Organization; M (IQR), median (interquartile range).

**Table S3** Results of the evaluation of participants' IC using the López-Ortiz IC scoring system

| **Items** | **Evaluation results** |
| --- | --- |
| **Psychological domain: CSDD** |  |
| CSDD score, M (IQR) | 4.0 (1.0, 14.0) |
| 1–10 points (scored 2) | 330 (69.5%) |
| 11–17 points (scored 1) | 48 (10.1%) |
| ≥ 18 points (scored 0) | 97 (20.4%) |
| **Locomotor domain: SPPB** |  |
| 10–12 points (scored 2) | 77 (16.2%) |
| 3–9 points (scored 1) | 265 (55.8%) |
| 0–2 points (scored 0) | 133 (28.0%) |
| **Cognitive domain: MMSE** |  |
| 27–30 points (scored 2) | 268 (56.4%) |
| 10–26 points (scored 1) | 207 (43.6%) |
| 0–9 points (scored 0) | 0 (0%) |
| **Vitality domain: MNA** |  |
| 24–30 points (scored 2) | 242 (50.9%) |
| 17–23.5 points (scored 1) | 126 (26.5%) |
| < 17 points (scored 0) | 107 (22.5%) |
| **Sensory domain (Vision): self-reported** |  |
| Scored 1 | 283 (59.6%) |
| Scored 0.5 | 117 (24.6%) |
| Scored 0 | 75 (15.8%) |
| **Sensory domain (Hearing): self-reported** |  |
| Scored 1 | 296 (62.3%) |
| Scored 0.5 | 106 (22.3%) |
| Scored 0 | 73 (15.4%) |
| **Total** |  |
| IC Score, M (IQR) | 8.0 (4.5, 9.0) |
| Significant loss of capacity (0–4.5 points) | 119 (25.1%) |
| Declining capacity (5–8.5 points) | 206 (43.4%) |
| High and stable capacity (9–10 points) | 150 (31.6%) |

**Abbreviations:** IC, intrinsic capacity; CSDD, Cornell Scale for Depression in Dementia; SPPB, Short Physical Performance Battery; MMSE, Mini**–**Mental State Examination; MNA, Mini–Nutritional Assessment; M (IQR), median (interquartile range).
